# Supplementary material
Source: PubMed Central journal article supplement (PMC7348547)
Supplement: JB.00156-20-s0001.pdf [file JB.00156-20-s0001.pdf]

## *Supplementary Material*

### **Free fatty acids interfere with the DNA binding activity of the virulence regulator PrfA of *Listeria monocytogenes***

Patrícia T. dos Santos<sup>a</sup>, Rikke S. S. Thomassen<sup>a</sup>, Mathias S. Green<sup>a</sup>, Nils J. Færgeman<sup>a</sup>, Birgitte H. Kallipolitis<sup>a</sup>#

<sup>a</sup>Department of Biochemistry and Molecular Biology, University of Southern Denmark, Odense M, Denmark

#Correspondence: Birgitte H. Kallipolitis, [bhk@bmb.sdu.dk](mailto:bhk@bmb.sdu.dk)

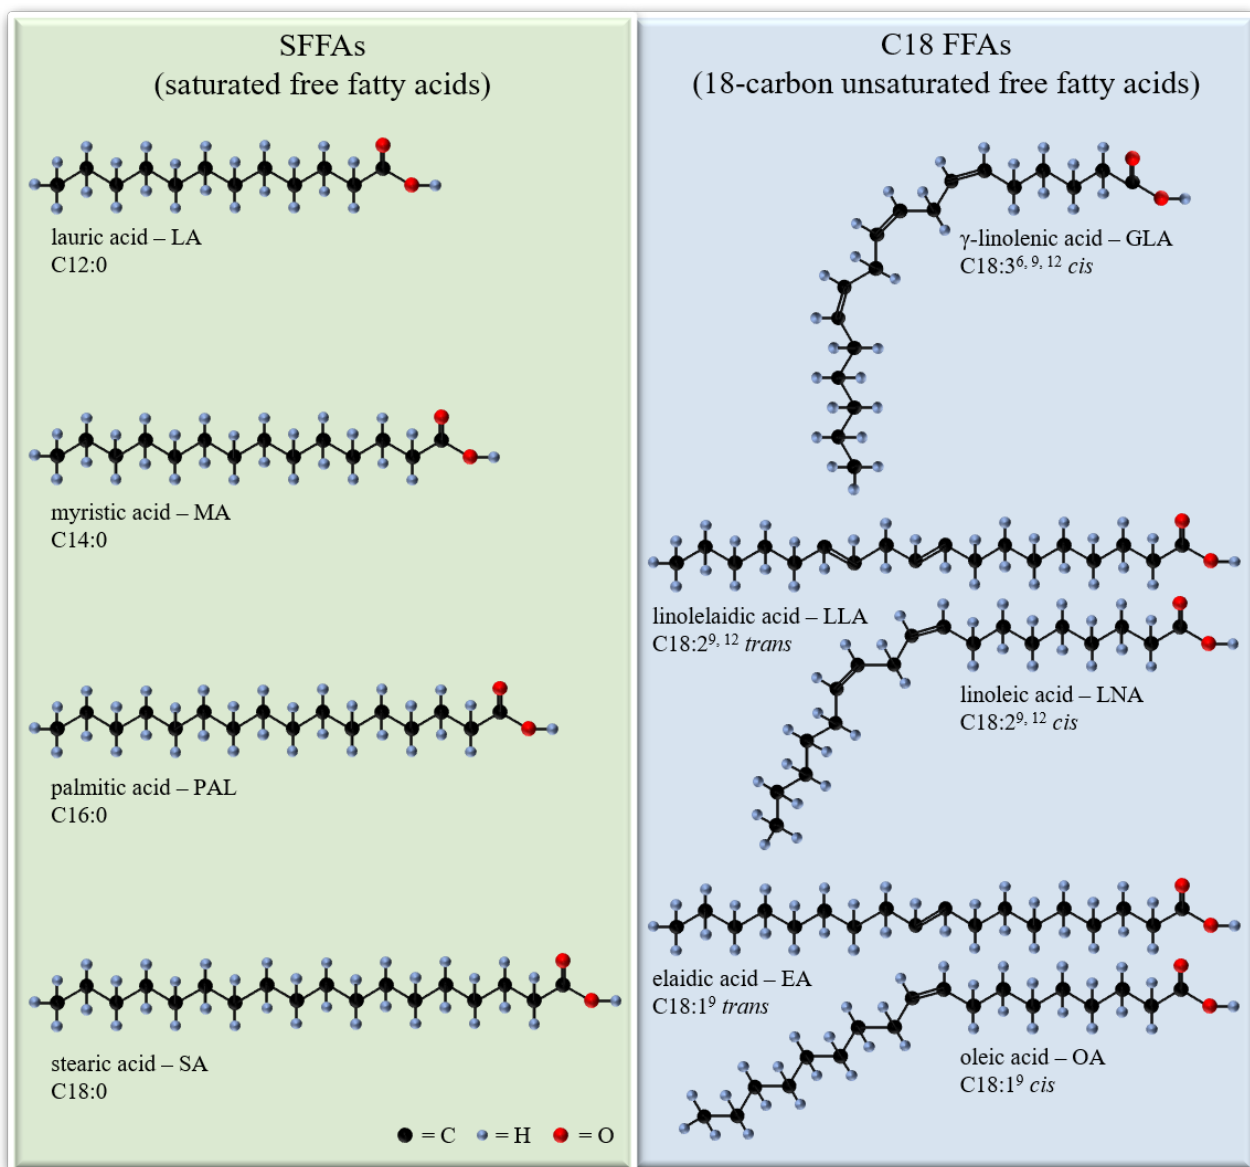

**Supplementary Figure S1:** FFA structures. 2D representation of the saturated FFAs (left) and C18 unsaturated FFAs (right) used in this study.

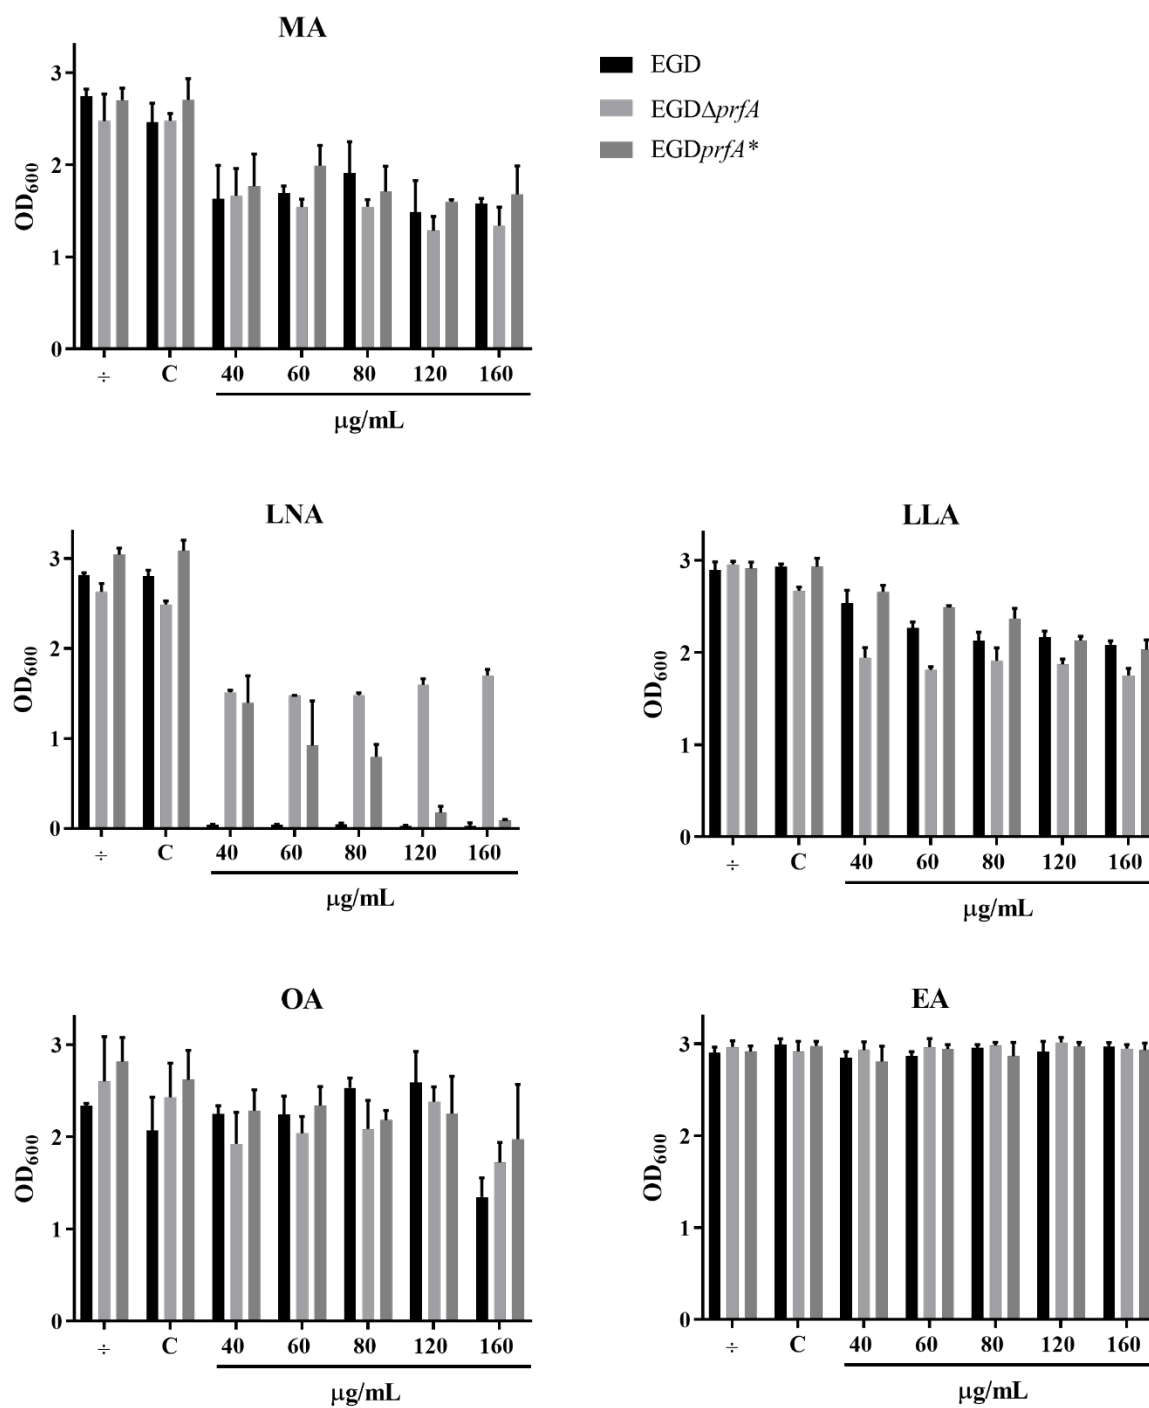

**Supplementary Figure S2:** Growth of EGD wild-type, EGDΔprfA and EGDprfA\* (*prfA*-G155S) in the presence of increasing concentrations of MA, LNA, LLA, OA and EA. OD<sub>600</sub> measurements were taken after 20 h of FFA exposure. As controls, the cultures were left untreated (÷) or vehicle was added corresponding to the highest concentration used (C). Results are the average of three biological replicates.

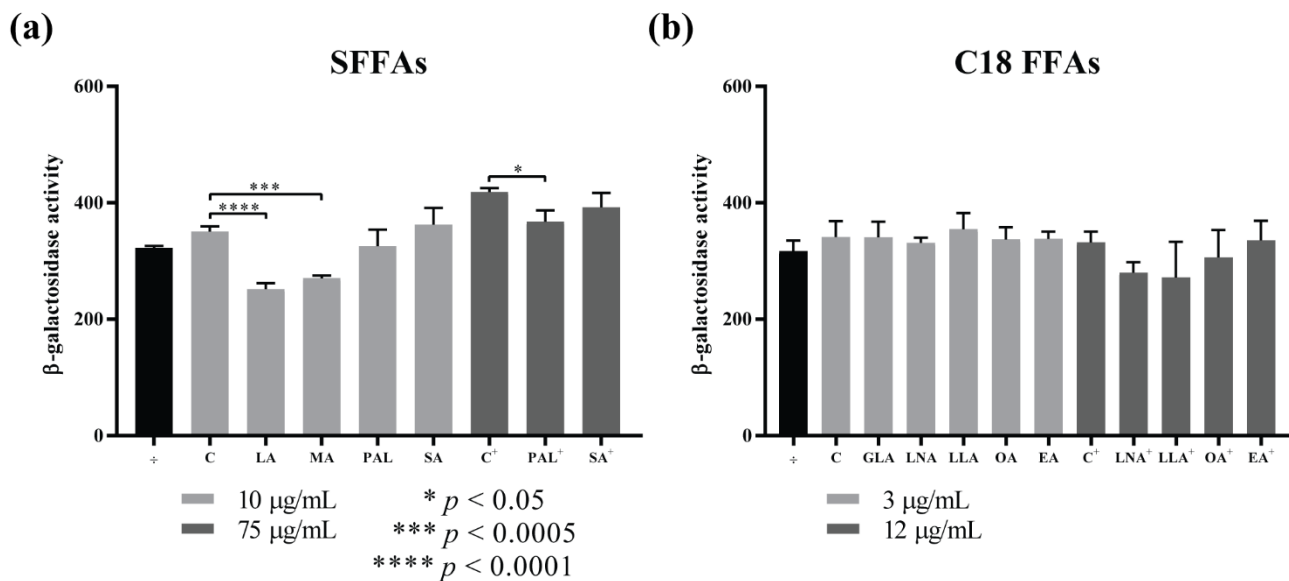

**Supplementary Figure S3:** Expression of *plhrA36-lacZ* in response to FFA exposure. The promoter region of the PrfA-independent *lhrA* gene cloned into vector pTCV-lac was transformed into EGD*prfA*<sup>\*</sup>. The resulting strain was grown to OD<sub>600</sub> = 0.3 and exposed to (A) SFFAs in a concentration of 10 µg/mL (50 µM LA, 44 µM MA, 39 µM PAL, 35 µM SA) or 75 µg/mL (293 µM PAL<sup>+</sup>, 264 µM SA<sup>+</sup>), or to (B) C18 FFAs in a concentration of 3 µg/mL (corresponding to 11 µM FFA) or 12 µg/mL (corresponding to 43 µM FFA<sup>+</sup>). As controls, the cultures were left untreated (÷) or vehicle was added corresponding to the concentration present in the FFA-treated cultures (C or C<sup>+</sup>). Samples for the β-galactosidase assays were withdrawn after 20 h. Results are the average of three biological replicates, each carried out in technical duplicates.

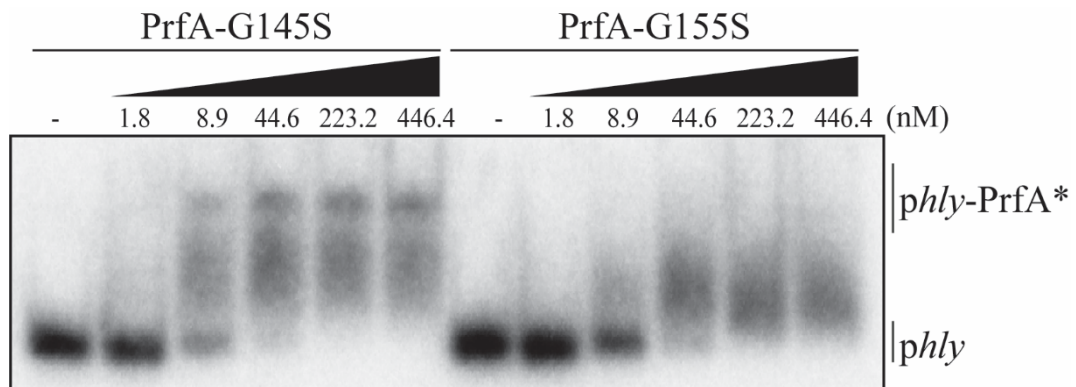

**Supplementary Figure S4:** *In vitro* PrfA\*-*phly* complex formation. EMSA of the interaction between labeled *phly* and increasing concentrations of purified His-tagged PrfA\* variants PrfA-G145S (left) or PrfA-G155S (right). For PrfA-G145S-*phly*, the smear observed underneath the shifted band most likely reflects the instability of the protein-DNA complex. The PrfA-G155S-*phly* complex appeared to be highly unstable; in this case, a specific shifted band could not be observed.

**Supplementary Table S1: Primers used in this study**

| Name                    | Sequence (5'→3')                                                  | Further information                                                                                                                                                                        |
|-------------------------|-------------------------------------------------------------------|--------------------------------------------------------------------------------------------------------------------------------------------------------------------------------------------|
| <b>Cloning</b>          |                                                                   |                                                                                                                                                                                            |
| <b>His-tag Fw PrfA</b>  | GGGGCCATGGCGCACCATCACCATCACCATAA<br>CGCTCAAGCAGAAGAATTC           | Forward primer for 6 × His-tag coding sequence inserted between codon 2 and 3 of <i>prfA</i> . NcoI restriction enzyme site is underlined. Nucleotide sequence for 6 × His-tag is in bold. |
| <b>G145S Rev PrfA</b>   | CATAGGTCAGGATTA <sup>AAA</sup> AGTTGACTGCAAATAG<br>AGCCAAGCTTCCCG | Reverse primer to introduce G145S substitution on <i>prfA</i> . Codon 145 where the nucleotide substitution GGT → AGT was introduced is highlighted.                                       |
| <b>G145S Fw PrfA</b>    | CGGGAAGCTTGGCTCTATTTGCAGTCAACTTTTA<br>ATCCTGACCTATG               | Forward primer to introduce G145S substitution on <i>prfA</i> . Codon 145 where the nucleotide substitution GGT → AGT was introduced is highlighted.                                       |
| <b>His-tag Rev PrfA</b> | CCCCTCTAGATTAATTTAATTTTCCCCAAGTAGC                                | Reverse primer for constructing 6 × His-tagged PrfA. XbaI restriction enzyme site is underlined.                                                                                           |
| <b>NB probes</b>        |                                                                   |                                                                                                                                                                                            |
| <b>ActA R</b>           | GCTATTAGGTCTGCTTTGTTC                                             | Single stranded probe for <i>actA</i> mRNA.                                                                                                                                                |
| <b>Hly R</b>            | CCATCTTTGTAACCTTTTCTTGG                                           | Single stranded probe for <i>hly</i> mRNA.                                                                                                                                                 |
| <b>InlA R</b>           | ATTTGCGGAAGGTGGTGTAG                                              | Single stranded probe for <i>inlA</i> mRNA.                                                                                                                                                |
| <b>PrfA R</b>           | GCTAGACTGTATGAAACTTG                                              | Single stranded probe for <i>prfA</i> mRNA.                                                                                                                                                |
| <b>16S rRNA</b>         | GGCATTACCCTACCAACTAGCTAATGCAC                                     | Single stranded probe for 16S rRNA.                                                                                                                                                        |
| <b>EMSAs</b>            |                                                                   |                                                                                                                                                                                            |
| <b>Phly short Fw</b>    | GTGACTTTTATGTTGAGGCA                                              | Forward primer to amplify a 54bp region containing the <i>hly</i> promoter.                                                                                                                |
| <b>Phly short Rev</b>   | CTGCTGTCCTTTATCG                                                  | Reverse primer to amplify a 54bp region containing the <i>hly</i> promoter.                                                                                                                |
